# Supplementary material
Source: MDPI journal article supplement (https://www.mdpi.com/2073-4352/13/12/1651)
Supplement: s1 [file s1]

## Supplementary Information

# Synthesis and Crystallization of N-rich triazole compounds

Emmanuele Parisi <sup>1\*</sup>, Roberto Centore <sup>2</sup>

<sup>1</sup> Department of Science and Applied Technology, Politecnico di Torino, Corso Duca degli Abruzzi 24, I-10129, Torino; emmanuele.parisi@polito.it

<sup>2</sup> Department of Chemical Sciences, Università degli Studi di Napoli Federico II, Via Cinthia, I- 80126, Napoli; roberto.centore@unina.it

\* Correspondence: [emmanuele.parisi@polito.it](mailto:emmanuele.parisi@polito.it)

## NMR Spectra

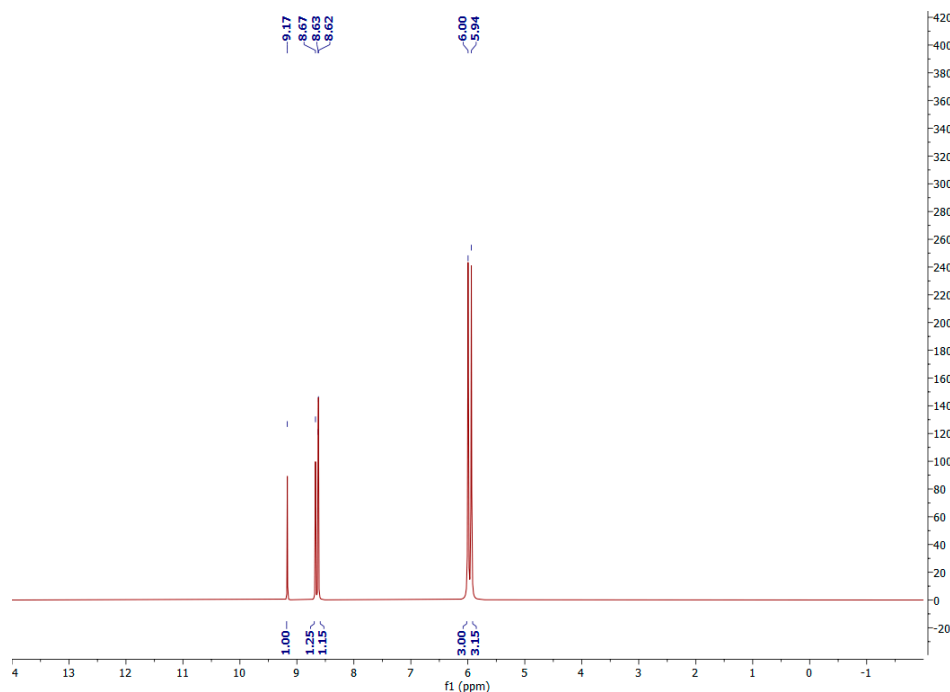

**FigureS1.** <sup>1</sup>H-NMR spectrum of Triaz1.

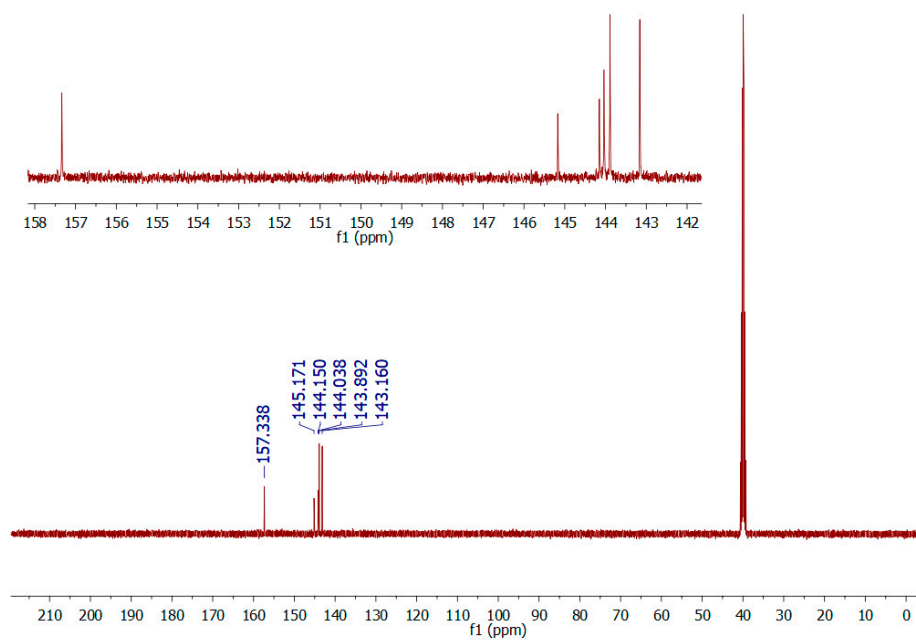FigureS2.  $^{13}\text{C}$ -NMR spectrum of Triaz1.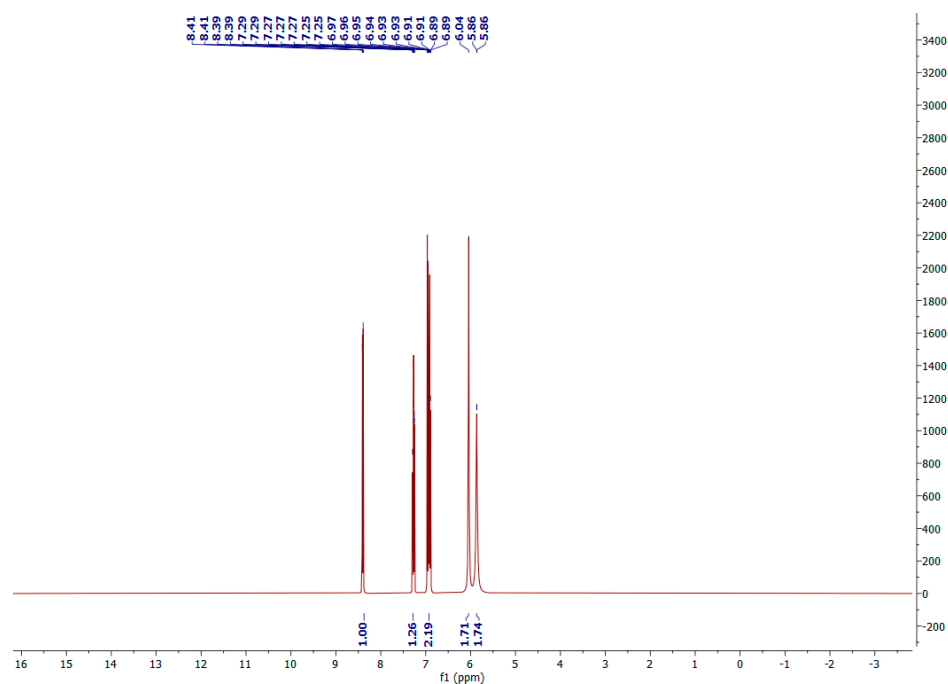FigureS3.  $^1\text{H}$ -NMR spectrum of Triaz2.

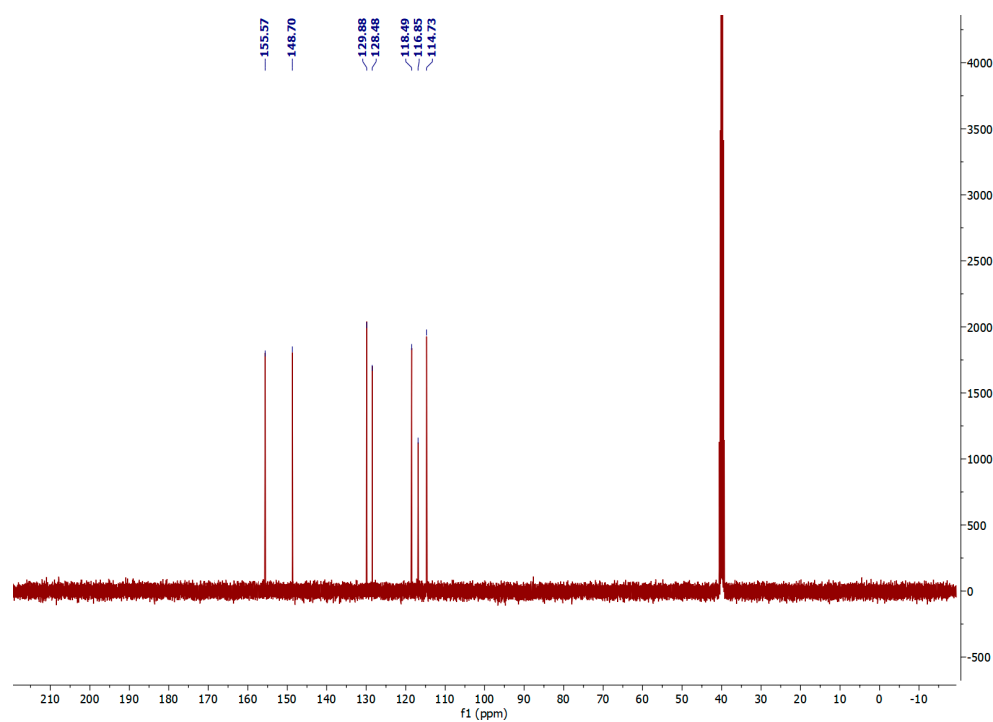

FigureS4. <sup>13</sup>C-NMR spectrum of Triaz2.

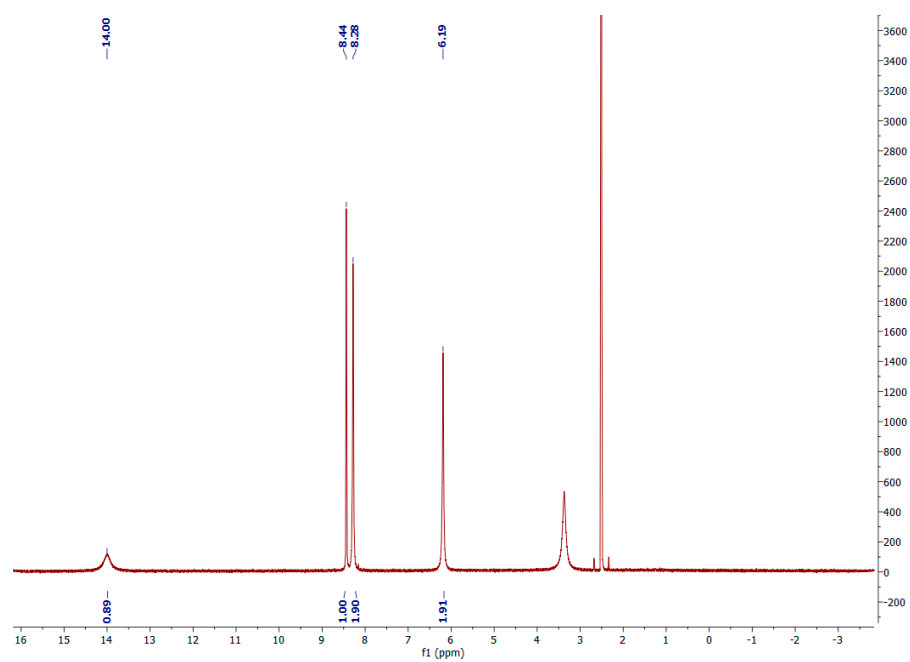

FigureS5. <sup>1</sup>H-NMR spectrum of DATr-HCl.

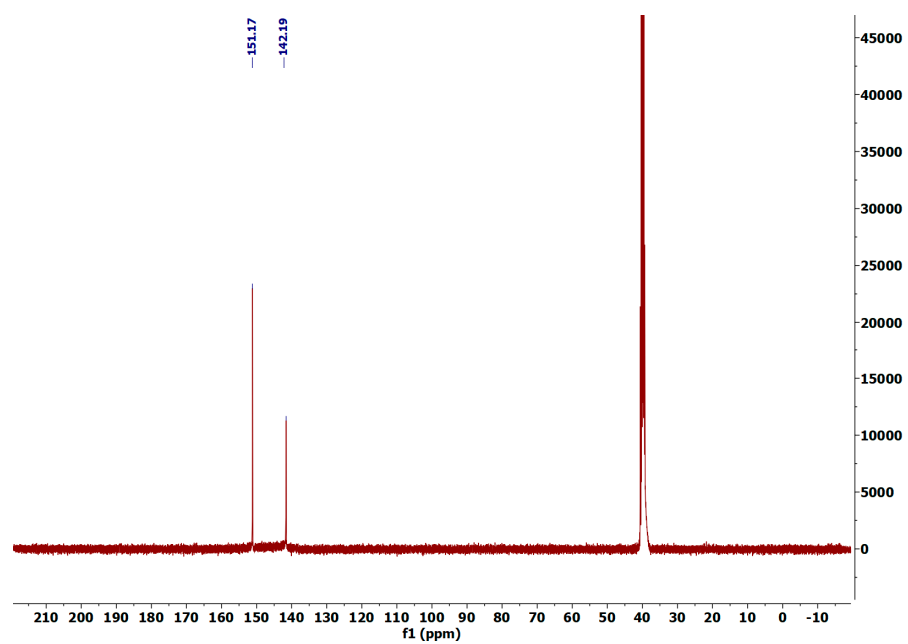

FigureS6.  $^{13}\text{C}$ -NMR spectrum of DATr-HCl.
